# Supplementary material for: Nanoporous hexagonal TiO2 superstructure as a multifunctional material for energy conversion and storage
Source: Royal Society of Chemistry journal article supplement (doi:10.1039/c4ta05988c), 2014-12-16
Supplement: c4ta05988c1.pdf [file c4ta05988c1.pdf]

## *Supporting Information*

# Nanoporous hexagonal TiO<sub>2</sub> superstructure as a multifunctional material for energy conversion and storage

*Eun Joo Lee,<sup>†,§</sup> Inho Nam,<sup>‡,§</sup> Jongheop Yi,<sup>‡,\*</sup> Jin Ho Bang<sup>†,§,\*</sup>*

<sup>†</sup>Department of Bionanotechnology, Hanyang University, 55 Hanyangdaehak-ro, Sangnok-gu, Ansan, Kyeonggi-do 426-791, South Korea, <sup>‡</sup>WCU Program of Chemical Convergence for Energy & Environment, School of Chemical and Biological Engineering, Institute of Chemical Processes, Seoul National University, Seoul 151-742, South Korea, <sup>§</sup>Department of Chemistry and Applied Chemistry, Hanyang University, 55 Hanyangdaehak-ro, Sangnok-gu, Ansan, Kyeonggi-do 426-791, South Korea.

<sup>§</sup>These authors contributed equally to this work.

**KEYWORDS.** Hexagonal TiO<sub>2</sub> superstructure, grain growth mechanism, nano-pores, dye-sensitized solar cells, lithium ion batteries

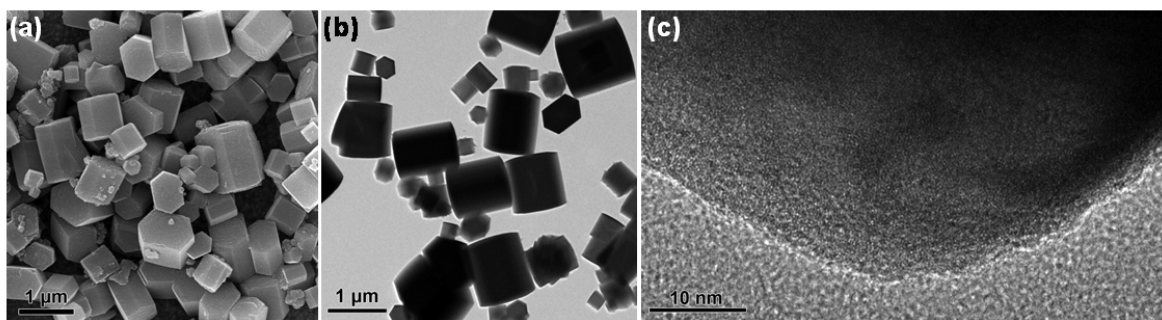

**Fig. S1** (a) SEM and (b and c) TEM images of HTO.

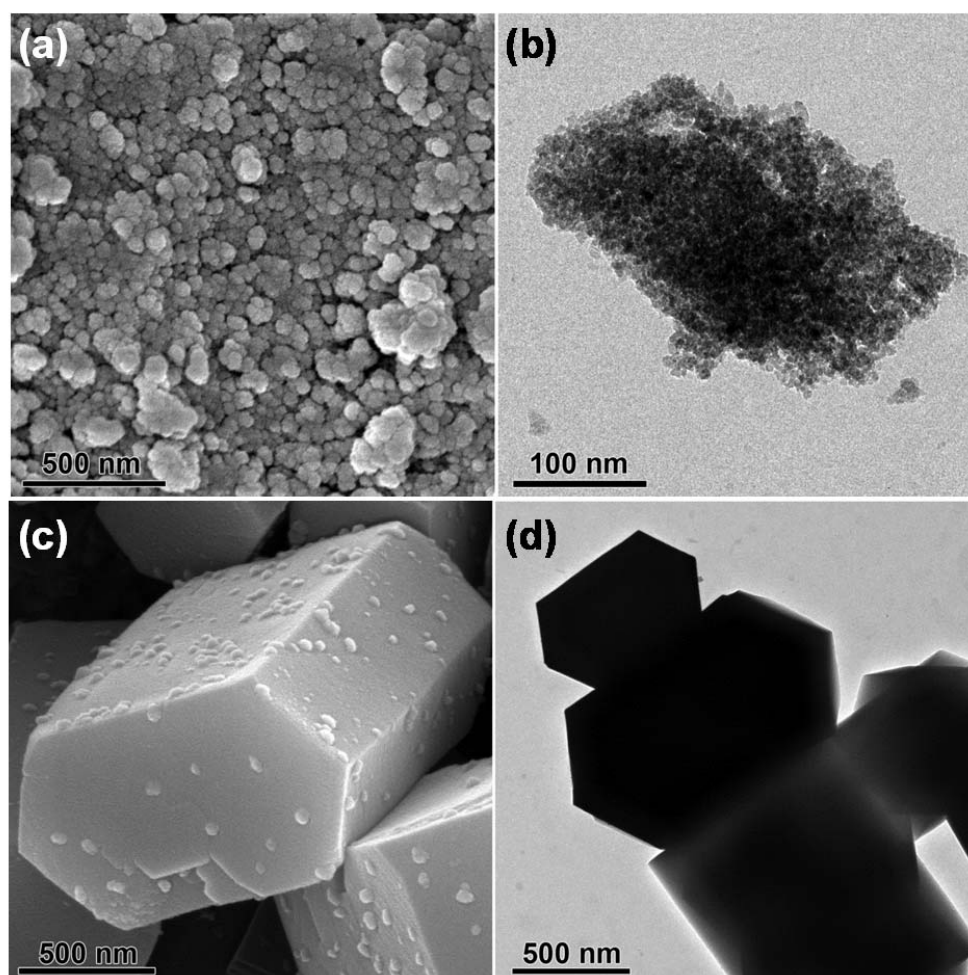

**Fig. S2** (a) SEM and (b) TEM images of  $\text{TiO}_2$  precursor prepared without oxalic acid (OA) and (c) SEM and (d) TEM images of  $\text{TiO}_2$  precursor prepared without sodium dodecyl benzene sulfonate (SBDS).

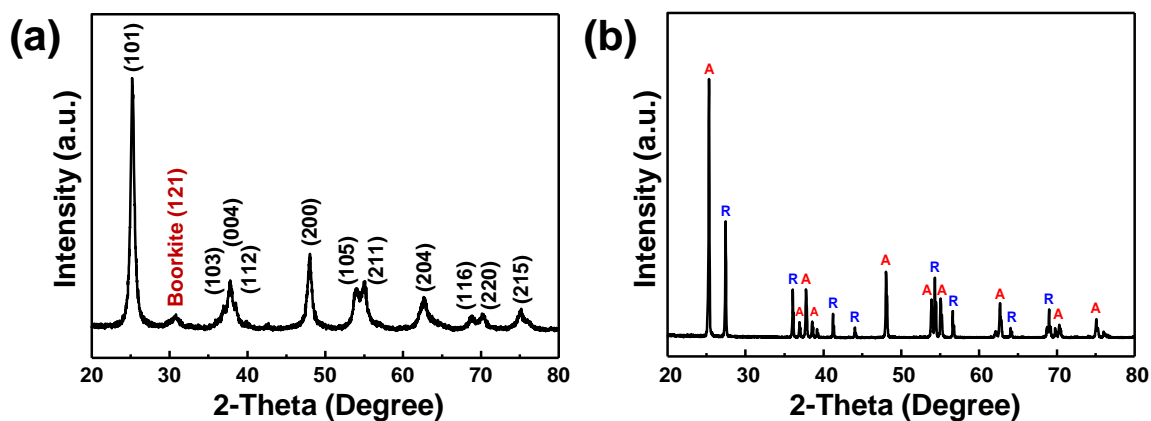

**Fig. S3** XRD pattern of (a) anatase/brookite TiO<sub>2</sub> obtained when HTO powder was directly transferred to a furnace held at 450 °C and annealed for 5 h and (b) anatase/rutile TiO<sub>2</sub> obtained when HTO powder was annealed at 900 °C for 5 h.

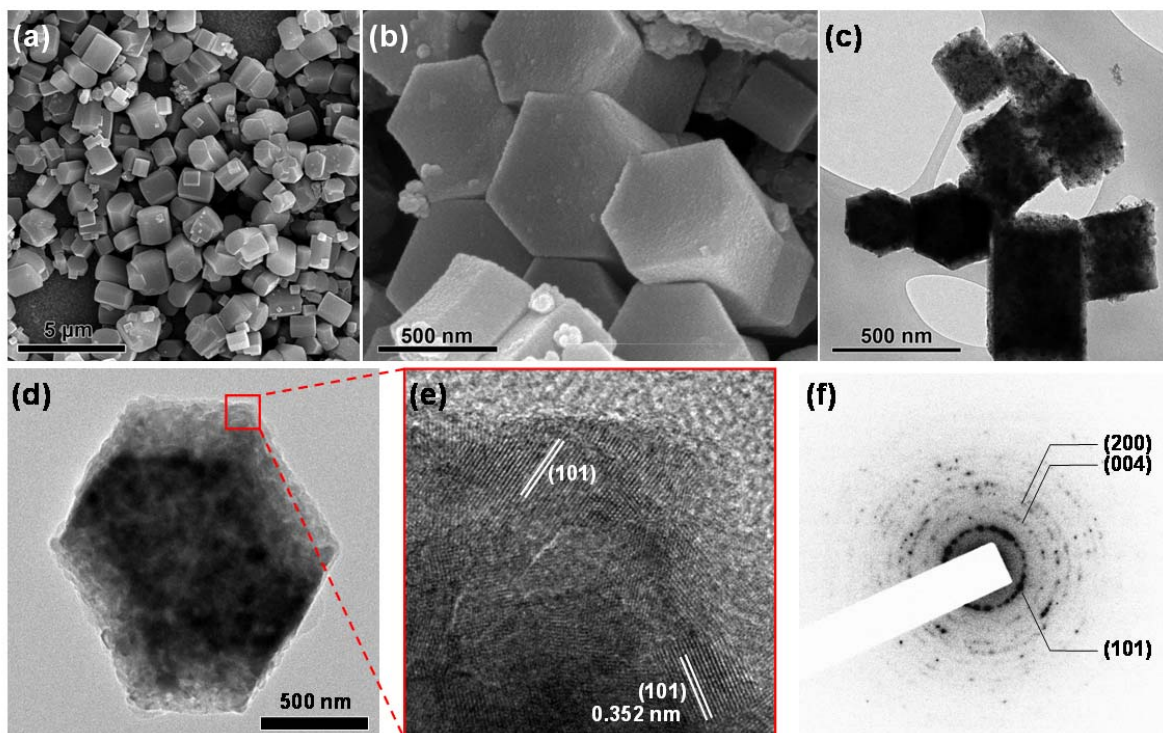

**Fig. S4** (a and b) SEM and (c-e) TEM images of HTS obtained by calcining HTO, and (f) its selected-area electron diffraction (SAED) patterns.

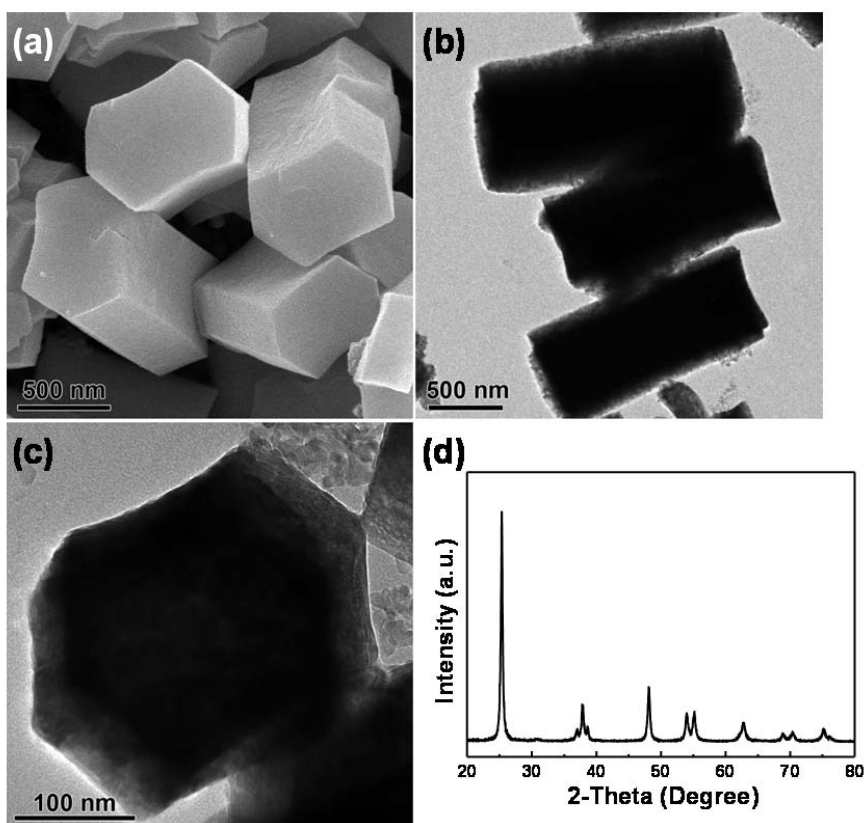

**Fig. S5** (a) SEM and (b) TEM images of TiO<sub>2</sub> obtained by calcining the TiO<sub>2</sub> precursor prepared without sodium dodecyl benzene sulfonate (SBDS), (c) XRD pattern of TiO<sub>2</sub> obtained by calcining the TiO<sub>2</sub> precursor prepared without sodium dodecyl benzene sulfonate (SBDS).

**Table S1.** Solar Cell Parameters of DSSCs with Various TiO<sub>2</sub> Films.

| TiO <sub>2</sub> films | J <sub>sc</sub> (mA cm <sup>-2</sup> ) | V <sub>oc</sub> (V) | FF   | η (%) |
|------------------------|----------------------------------------|---------------------|------|-------|
| NT/HTS                 | 18.0                                   | 0.74                | 0.57 | 7.6   |
| NT only                | 16.0                                   | 0.73                | 0.56 | 6.4   |
| NT/DSL                 | 16.7                                   | 0.73                | 0.56 | 6.8   |

**Table S2.** Solar Cell Parameters of DSSCs with TiO<sub>2</sub> Film of NT/HTS from multiple cell measurements.

| NT/HTS | J <sub>sc</sub> (mA/cm <sup>2</sup> ) | V <sub>oc</sub> (V) | FF    | Eff (%)     |
|--------|---------------------------------------|---------------------|-------|-------------|
| Cell 1 | 18.0                                  | 0.737               | 0.570 | <b>7.58</b> |
| Cell 2 | 18.2                                  | 0.741               | 0.555 | 7.48        |
| Cell 3 | 17.6                                  | 0.737               | 0.575 | 7.44        |

**Table S3.** Solar Cell Parameters of DSSCs with TiO<sub>2</sub> Film of NT only from multiple cell measurements.

| NT only | J <sub>sc</sub> (mA/cm <sup>2</sup> ) | V <sub>oc</sub> (V) | FF    | Eff (%)     |
|---------|---------------------------------------|---------------------|-------|-------------|
| Cell 1  | 16.0                                  | 0.732               | 0.558 | <b>6.44</b> |
| Cell 2  | 16.1                                  | 0.722               | 0.570 | 6.61        |
| Cell 3  | 15.9                                  | 0.707               | 0.565 | 6.33        |

**Table S4.** Solar Cell Parameters of DSSCs with TiO<sub>2</sub> Film of NT/DSL from multiple cell measurements.

| NT/DSL | J <sub>sc</sub> (mA/cm <sup>2</sup> ) | V <sub>oc</sub> (V) | FF    | Eff (%)     |
|--------|---------------------------------------|---------------------|-------|-------------|
| Cell 1 | 16.7                                  | 0.725               | 0.562 | <b>6.81</b> |
| Cell 2 | 16.5                                  | 0.725               | 0.567 | 6.79        |
| Cell 3 | 16.3                                  | 0.731               | 0.584 | 6.94        |

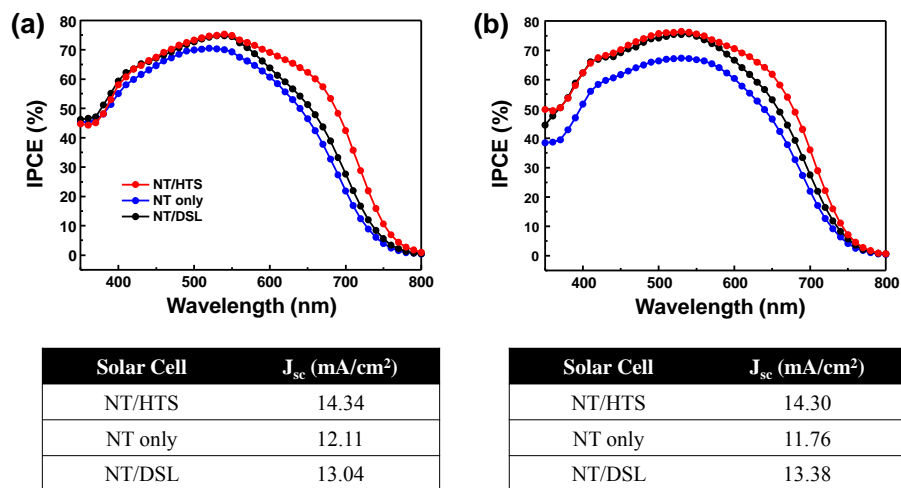

**Fig. S6** IPCE curves of DSSCs with different photoanodes from multiple measurements and photocurrent obtained by integration of IPCE spectra. Note that the integrated J<sub>sc</sub> values from the IPCE measurements are lower than those from J-V curve measurement because of mismatch in area and shape between excitation beam (rectangle: 0.1 cm×0.7 cm) and active area of solar cells (circle with 0.5 cm in diameter). Thus, some of photons from the excitation did not reach the active area during IPCE measurements.

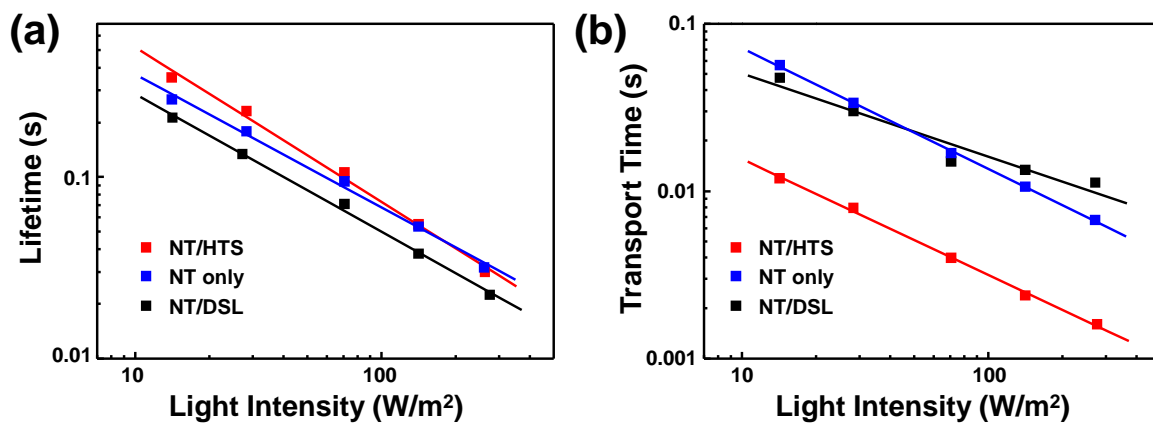

**Fig. S7** (a) Electron lifetime and (b) electron transport time as a function of light intensity for DSSCs with different TiO<sub>2</sub> layers.

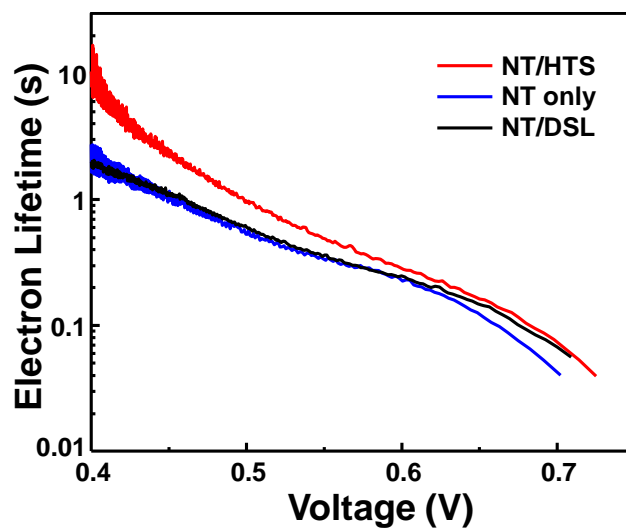

**Fig. S8** Electron lifetimes of DSSCs with different TiO<sub>2</sub> layers obtained from photovoltage decay measurement.

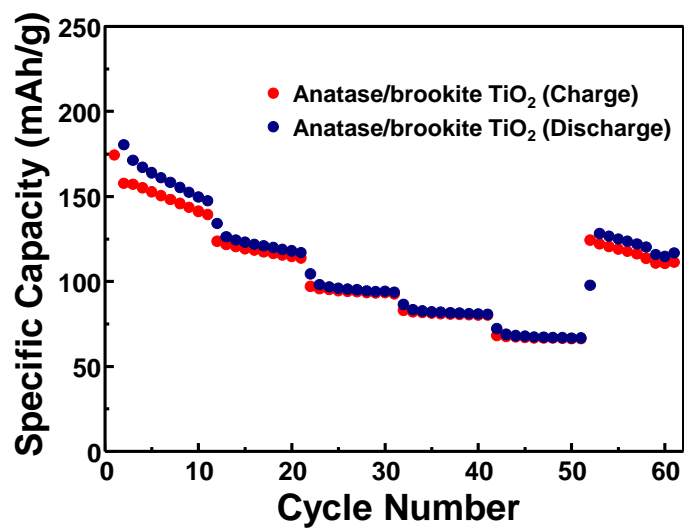

**Fig. S9** Specific capacities of anatase/brookite  $\text{TiO}_2$  at various C rates.

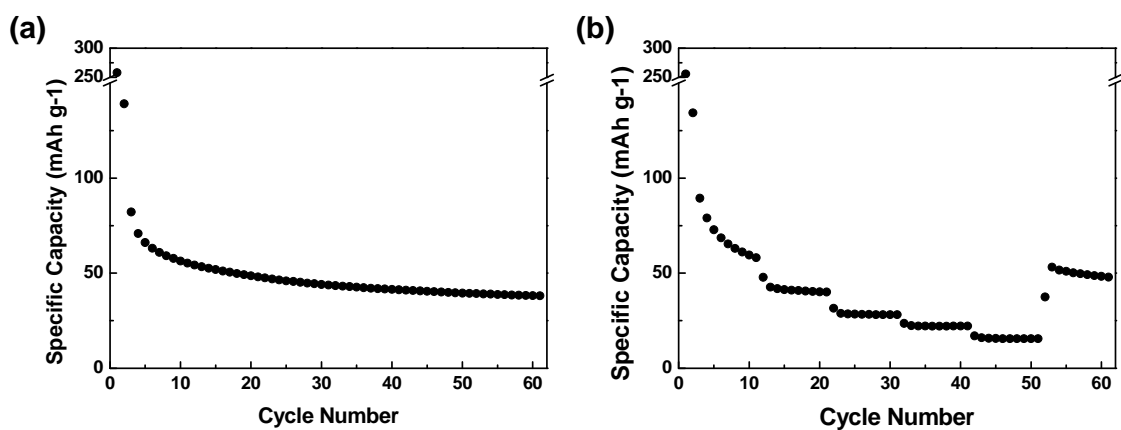

**Fig. S10** (a) Specific capacities of P25 anodes at 0.5 C during the first 100 galvanostatic cycles and (b) specific capacities of P25 cycled at various C-rates (0.5, 1, 2, 3, 5, and 0.5 C).



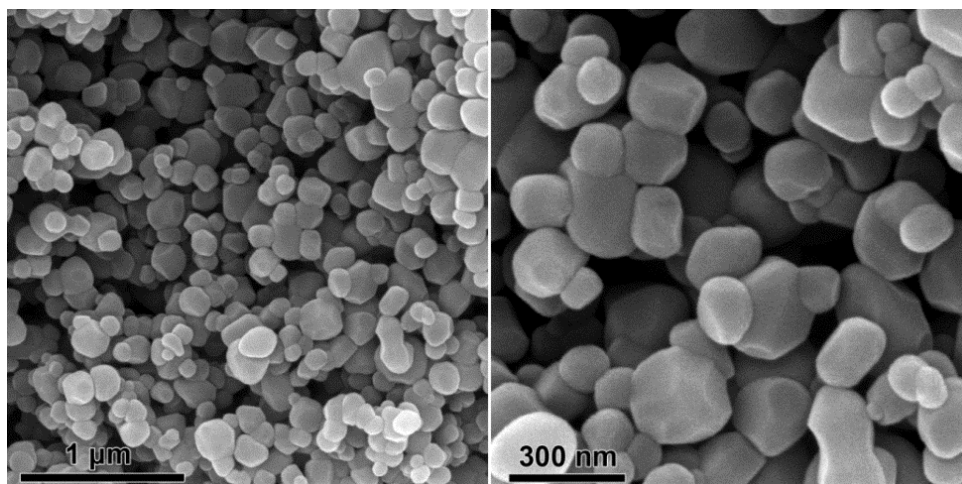

**Fig. S11** SEM images of C-TiO<sub>2</sub> (anatase, Sigma-Aldrich).

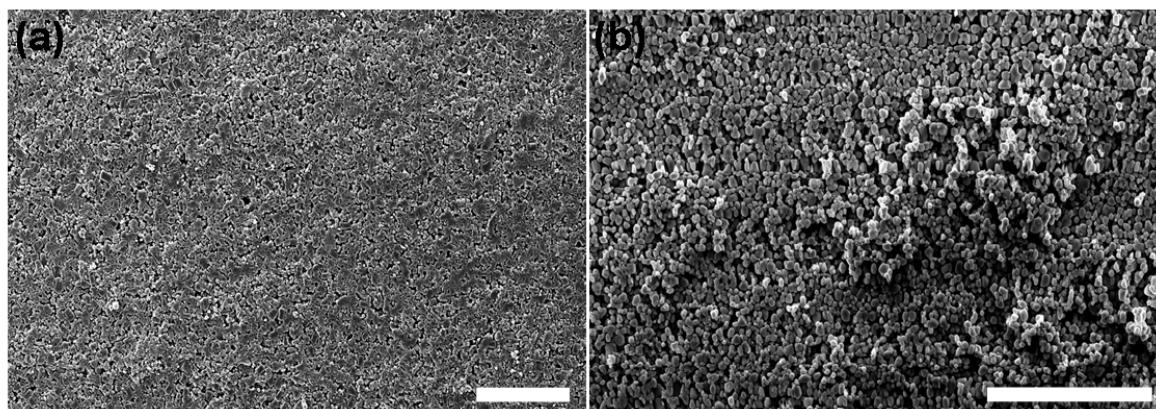

**Fig. S12** SEM images of (a) pelletized HTS and (b) pelletized conventional anatase TiO<sub>2</sub> spheres. Scale bar is 10 μm.

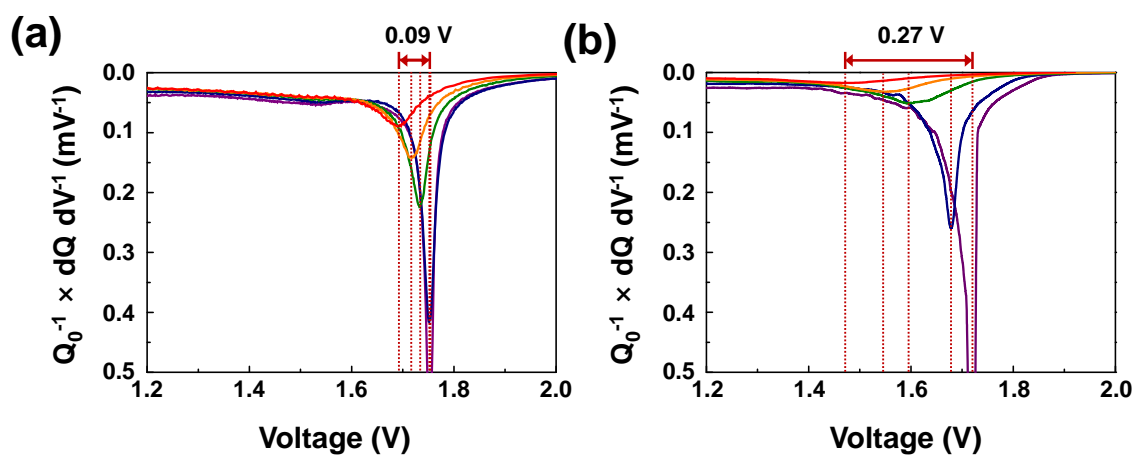

**Fig. S13** Differential capacities of (a) HTS and (b) C-TiO<sub>2</sub> anodes at various C-rates.



**Table S5.** Fitted Impedance Parameters of Nyquist Plots.

| Active material    | $R_s$ ( $\Omega$ ) | $R_{ct}$ ( $\Omega$ ) | $Q_y$ of $CPE_{pn}$ (mF) | $A_w^*$ ( $m\Omega s^{-0.5}$ ) |
|--------------------|--------------------|-----------------------|--------------------------|--------------------------------|
| HTS                | 3.29               | 119.1                 | 42.6                     | 0.4                            |
| C-TiO <sub>2</sub> | 4.19               | 246.4                 | 0.9                      | 28.7                           |

$$*A_w = RT/(n^2 F^2 A^2) (2/D)^{1/2} C.$$

where R is the gas constant, T is the temperature,  $n$  is the transferred electron number, A is the electrode area, D is the diffusion coefficient of  $Li^+$  in electrode and C is the concentration of  $Li^+$ .
